# Supplementary material
Source: PubMed Central journal article supplement (PMC4789167)
Supplement: NIHMS762151-supplement-2.pdf [file NIHMS762151-supplement-2.pdf]

**Supplemental Table 1: summary statistics of all aging experiments.**

Mean lifespan, restricted mean survival time. SEM, standard error of the mean. N, total number of animals in the indicated experimental group. Censored, number of censored observations. *P* values determined with the log-rank test, adjusted with the Bonferroni-Holm method to control for multiple comparisons. “*P* vs. control” are comparisons with the indicated control group in each experiment. “*P* vs. 50 mM NaCl” are comparisons between groups which only differ by NaCl concentration (genotype, FUdR treatment, etc. are identical). “*P* vs. no FUdR” are comparisons between groups which only differ by FUdR concentration (genotype, NaCl concentration, etc. are identical).

|                                                                                                      | Experimental group | Mean lifespan (days) | SEM | Lifespan percentiles (days) |      |     |        | N (censored) | <i>P</i> vs. control | <i>P</i> vs. 50 mM NaCl | <i>P</i> vs. no FUdR |
|------------------------------------------------------------------------------------------------------|--------------------|----------------------|-----|-----------------------------|------|-----|--------|--------------|----------------------|-------------------------|----------------------|
|                                                                                                      |                    |                      |     | 25%                         | 50%  | 75% | 95%    |              |                      |                         |                      |
| <b>Experiment 1</b> ,<br>shown in Figure 1A<br>and Figure S1. 1<br>replicate, 25° C, 400<br>µM FUdR. | 50 mM              | 14.8                 | 0.2 | 13                          | 15   | 16  | 18     | 69(0)        | control              |                         |                      |
|                                                                                                      | 150 mM             | 17.7                 | 0.4 | 16                          | 19   | 20  | 21     | 69(0)        | <0.0001              |                         |                      |
|                                                                                                      | 250 mM             | 20.8                 | 0.5 | 19                          | 21.5 | 23  | 26     | 50(0)        | <0.0001              |                         |                      |
|                                                                                                      | 350 mM             | 20.8                 | 0.4 | 19                          | 21   | 24  | 26     | 57(0)        | <0.0001              |                         |                      |
|                                                                                                      | 450 mM             | 16.0                 | 0.6 | 13                          | 16   | 19  | 24     | 48(0)        | 0.0017               |                         |                      |
| <b>Experiment 2</b> ,<br>shown in Figure 1B.<br>1 replicate, 25° C,<br>400 µM FUdR.                  | 50 mM NaCl         | 15.5                 | 0.2 | 14                          | 17   | 17  | 19     | 96(1)        | control              |                         |                      |
|                                                                                                      | 300 mM NaCl        | 20.5                 | 0.4 | 18                          | 20   | 23  | 27     | 104(1)       | <0.0001              |                         |                      |
|                                                                                                      | 250 mM KCl         | 19.1                 | 0.5 | 16                          | 20   | 23  | 25     | 60(0)        | <0.0001              |                         |                      |
|                                                                                                      | 500 mM glycerol    | 20.7                 | 0.4 | 18                          | 20   | 23  | 25     | 67(0)        | <0.0001              |                         |                      |
|                                                                                                      | 500 mM sorbitol    | 21.6                 | 0.5 | 18                          | 20   | 25  | 30     | 106(0)       | <0.0001              |                         |                      |
| <b>Experiment 3</b> ,<br>shown in Figure 2A.<br>2 pooled replicates,<br>20° C, 0 or 400 µM<br>FUdR.  | 50 mM              | 16.6                 | 0.4 | 11                          | 16   | 20  | 25     | 193(60)      | control              |                         |                      |
|                                                                                                      | 100 mM             | 14.0                 | 0.4 | 10                          | 14   | 18  | 22     | 178(40)      | 0.0001               |                         |                      |
|                                                                                                      | 200 mM             | 11.1                 | 0.3 | 8                           | 10   | 11  | 18     | 194(34)      | <0.0001              |                         |                      |
|                                                                                                      | 300 mM             | 10.0                 | 0.2 | 8                           | 10   | 11  | 16     | 194(24)      | <0.0001              |                         |                      |
|                                                                                                      | 400 mM             | 9.5                  | 0.2 | 8                           | 10   | 11  | 14     | 193(23)      | <0.0001              |                         |                      |
|                                                                                                      | 500 mM             | 2.7                  | 0.1 | 2                           | 2    | 2   | 6      | 202(2)       | <0.0001              |                         |                      |
|                                                                                                      | 50 mM + FUdR       | 16.0                 | 0.3 | 14                          | 18   | 18  | 20     | 188(40)      | 0.2123               |                         |                      |
|                                                                                                      | 100 mM + FUdR      | 17.9                 | 0.3 | 16                          | 18   | 20  | 22     | 192(22)      | 1.0000               | <0.0001                 | <0.0001              |
|                                                                                                      | 200 mM + FUdR      | 19.9                 | 0.3 | 18                          | 20   | 22  | 27     | 197(5)       | <0.0001              | <0.0001                 | <0.0001              |
|                                                                                                      | 300 mM + FUdR      | 19.2                 | 0.2 | 18                          | 20   | 22  | 25     | 192(4)       | 0.0082               | <0.0001                 | <0.0001              |
| 400 mM + FUdR                                                                                        | 17.0               | 0.4                  | 14  | 18                          | 20   | 24  | 196(9) | 1.0000       | 0.0046               | <0.0001                 |                      |
| 500 mM + FUdR                                                                                        | 2.7                | 0.2                  | 2   | 2                           | 2    | 4   | 196(0) | <0.0001      | <0.0001              | 1.0000                  |                      |

|                                                                                                                                                                                                                        | Experimental group                                                                            | Mean lifespan (days) | SEM  | Lifespan percentiles (days) |     |     |     | N (censored) | P vs. control | P vs. 50 mM NaCl | P vs. no FUdR |
|------------------------------------------------------------------------------------------------------------------------------------------------------------------------------------------------------------------------|-----------------------------------------------------------------------------------------------|----------------------|------|-----------------------------|-----|-----|-----|--------------|---------------|------------------|---------------|
|                                                                                                                                                                                                                        |                                                                                               |                      |      | 25%                         | 50% | 75% | 95% |              |               |                  |               |
| <b>Experiment 4,</b><br>shown in Figure 2B.<br>3 pooled replicates,<br>20° C, 0, 8, 40 or<br>400 μM FUdR.<br><b>Experiment 7,</b><br>shown in Figure 2B.<br>3 pooled replicates,<br>20° C, 0, 8, 40 or<br>400 μM FUdR. | 50 mM, 0 μM<br>FUdR                                                                           | 17.1                 | 0.5  | 13                          | 17  | 21  | 27  | 226(73)      | control       |                  |               |
|                                                                                                                                                                                                                        | 50 mM, 8 μM<br>FUdR                                                                           | 19.7                 | 0.5  | 14                          | 19  | 27  | 31  | 228(53)      | 0.0006        |                  |               |
|                                                                                                                                                                                                                        | 50 mM, 40 μM<br>FUdR                                                                          | 18.6                 | 0.4  | 14                          | 17  | 23  | 28  | 226(16)      | 0.1555        |                  |               |
|                                                                                                                                                                                                                        | 50 mM, 400 μM<br>FUdR                                                                         | 18.6                 | 0.3  | 17                          | 17  | 21  | 24  | 232(88)      | 0.2186        |                  |               |
|                                                                                                                                                                                                                        | 300 mM, 0 μM<br>FUdR                                                                          | 13.0                 | 0.3  | 11                          | 11  | 15  | 21  | 241(93)      | <0.0001       |                  |               |
|                                                                                                                                                                                                                        | 300 mM, 8 μM<br>FUdR                                                                          | 13.3                 | 0.3  | 11                          | 13  | 15  | 21  | 232(9)       | <0.0001       | <0.0001          | 1.0000        |
|                                                                                                                                                                                                                        | 300 mM, 40 μM<br>FUdR                                                                         | 15.6                 | 0.3  | 13                          | 15  | 19  | 24  | 239(18)      | 0.0057        | <0.0001          | <0.0001       |
|                                                                                                                                                                                                                        | 300 mM, 400 μM<br>FUdR                                                                        | 21.7                 | 0.3  | 19                          | 22  | 24  | 28  | 232(11)      | <0.0001       | <0.0001          | <0.0001       |
|                                                                                                                                                                                                                        | <b>Experiment 5,</b><br>shown in Figure 2C.<br>3 pooled replicates,<br>25° C, 400 μM<br>FUdR. | N2 50 mM             | 12.0 | 0.1                         | 11  | 12  | 14  | 14           | 279(5)        | control          |               |
| N2 300 mM                                                                                                                                                                                                              |                                                                                               | 17.0                 | 0.3  | 12                          | 17  | 21  | 25  | 281(2)       | <0.0001       |                  |               |
| <i>osm-11</i> 50 mM                                                                                                                                                                                                    |                                                                                               | 13.6                 | 0.2  | 11                          | 14  | 17  | 20  | 348(7)       | <0.0001       |                  |               |
| <i>osm-11</i> 300 mM                                                                                                                                                                                                   |                                                                                               | 15.4                 | 0.3  | 12                          | 16  | 20  | 24  | 290(6)       | <0.0001       | <0.0001          |               |
| <b>Experiment 6,</b><br>shown in Figure 2C.<br>3 pooled replicates,<br>25° C, 400 μM<br>FUdR.                                                                                                                          | N2 50 mM                                                                                      | 12.7                 | 0.1  | 12                          | 13  | 14  | 15  | 277(3)       | control       |                  |               |
|                                                                                                                                                                                                                        | N2 300 mM                                                                                     | 16.2                 | 0.3  | 12                          | 17  | 21  | 24  | 296(0)       | <0.0001       |                  |               |
|                                                                                                                                                                                                                        | <i>osm-7</i> 50 mM                                                                            | 14.5                 | 0.2  | 12                          | 14  | 17  | 19  | 273(4)       | <0.0001       |                  |               |
|                                                                                                                                                                                                                        | <i>osm-7</i> 300 mM                                                                           | 16.9                 | 0.4  | 11                          | 16  | 23  | 30  | 278(0)       | <0.0001       | <0.0001          |               |
| <b>Experiment 7,</b><br>shown in Figure 2D.<br>2 pooled replicates,<br>20° C, 0 or 400 μM<br>FUdR.                                                                                                                     | N2 50 mM                                                                                      | 17.1                 | 0.4  | 14                          | 16  | 21  | 25  | 149(26)      | control       |                  |               |
|                                                                                                                                                                                                                        | N2 300 mM                                                                                     | 10.0                 | 0.2  | 8                           | 9   | 10  | 16  | 149(23)      | <0.0001       |                  |               |
|                                                                                                                                                                                                                        | N2 50 mM +<br>FUdR                                                                            | 17.0                 | 0.3  | 16                          | 18  | 19  | 21  | 151(37)      | 0.3949        |                  |               |
|                                                                                                                                                                                                                        | N2 300 mM +<br>FUdR                                                                           | 19.8                 | 0.3  | 18                          | 19  | 23  | 25  | 150(1)       | 0.0016        | <0.0001          | <0.0001       |
|                                                                                                                                                                                                                        | <i>osm-7; osm-11</i> 50<br>mM                                                                 | 12.7                 | 0.4  | 10                          | 12  | 14  | 18  | 145(92)      | <0.0001       |                  |               |
|                                                                                                                                                                                                                        | <i>osm-7; osm-11</i><br>300 mM                                                                | 9.5                  | 0.2  | 8                           | 10  | 10  | 14  | 153(40)      | <0.0001       | <0.0001          |               |
|                                                                                                                                                                                                                        | <i>osm-7; osm-11</i> 50<br>mM + FUdR                                                          | 22.3                 | 0.5  | 18                          | 23  | 27  | 32  | 147(12)      | <0.0001       |                  | <0.0001       |
|                                                                                                                                                                                                                        | <i>osm-7; osm-11</i><br>300 mM + FUdR                                                         | 21.0                 | 0.6  | 16                          | 21  | 25  | 32  | 140(5)       | <0.0001       | 0.4717           | <0.0001       |

|                                                                                                    | Experimental group                 | Mean lifespan (days) | SEM | Lifespan percentiles (days) |      |      |        | N (censored) | P vs. control | P vs. 50 mM NaCl | P vs. no FUdR |
|----------------------------------------------------------------------------------------------------|------------------------------------|----------------------|-----|-----------------------------|------|------|--------|--------------|---------------|------------------|---------------|
|                                                                                                    |                                    |                      |     | 25%                         | 50%  | 75%  | 95%    |              |               |                  |               |
| <b>Experiment 8,</b><br>shown in Figure 3A.<br>3 pooled replicates,<br>20° C, 0 or 400 μM<br>FUdR. | <i>control(RNAi)</i> 50 mM         | 13.9                 | 0.4 | 11                          | 13   | 18   | 22     | 149(2)       | control       |                  |               |
|                                                                                                    | <i>control(RNAi)</i> 300 mM        | 8.3                  | 0.3 | 6                           | 8    | 11   | 13     | 151(6)       | <0.0001       |                  |               |
|                                                                                                    | <i>control(RNAi)</i> 50 mM + FUdR  | 16.1                 | 0.4 | 13                          | 18   | 20   | 22     | 151(3)       | 0.0129        |                  |               |
|                                                                                                    | <i>control(RNAi)</i> 300 mM + FUdR | 21.5                 | 0.3 | 20                          | 22   | 25   | 27     | 150(6)       | <0.0001       | <0.0001          | <0.0001       |
|                                                                                                    | <i>tmys-1(RNAi)</i> 50 mM          | 15.7                 | 0.4 | 13                          | 16.5 | 20   | 22     | 148(10)      | 0.0521        |                  |               |
|                                                                                                    | <i>tmys-1(RNAi)</i> 300 mM         | 21.2                 | 0.4 | 20                          | 22   | 25   | 27     | 150(0)       | <0.0001       | <0.0001          |               |
|                                                                                                    | <i>tmys-1(RNAi)</i> 50 mM + FUdR   | 17.6                 | 0.4 | 13                          | 18   | 20   | 25     | 151(0)       | <0.0001       |                  | 0.0070        |
|                                                                                                    | <i>tmys-1(RNAi)</i> 300 mM + FUdR  | 24.6                 | 0.3 | 22                          | 25   | 27   | 29     | 150(0)       | <0.0001       | <0.0001          | <0.0001       |
| <b>Experiment 9,</b><br>shown in Figure 3B.<br>3 pooled replicates,<br>20° C, 0 or 400 μM<br>FUdR. | N2 50 mM                           | 17.4                 | 0.3 | 12                          | 18   | 22   | 26     | 314(41)      | control       |                  |               |
|                                                                                                    | N2 300                             | 8.9                  | 0.2 | 8                           | 8    | 10   | 14     | 322(80)      | <0.0001       |                  |               |
|                                                                                                    | N2 50 mM + FUdR                    | 16.1                 | 0.3 | 12                          | 16   | 20   | 24     | 318(27)      | 0.0003        |                  |               |
|                                                                                                    | N2 300 mM + FUdR                   | 24.0                 | 0.3 | 20                          | 24   | 28   | 32     | 322(14)      | <0.0001       | <0.0001          | <0.0001       |
|                                                                                                    | <i>nth-1</i> 50 mM                 | 18.6                 | 0.4 | 14                          | 20   | 22   | 28     | 315(34)      | 0.0405        |                  |               |
|                                                                                                    | <i>nth-1</i> 300 mM                | 8.6                  | 0.1 | 8                           | 8    | 10   | 14     | 313(50)      | <0.0001       | <0.0001          |               |
|                                                                                                    | <i>nth-1</i> 50 mM + FUdR          | 17.0                 | 0.3 | 14                          | 18   | 22   | 24     | 316(36)      | 0.0612        |                  | <0.0001       |
|                                                                                                    | <i>nth-1</i> 300 mM + FUdR         | 17.7                 | 0.3 | 14                          | 18   | 20   | 24     | 313(4)       | 0.2443        | 0.2443           | <0.0001       |
| <b>Experiment 10,</b><br>shown in Figure 5C.<br>3 pooled replicates,<br>25° C, 400 μM<br>FUdR.     | N2 50 mM                           | 12.4                 | 0.2 | 11                          | 13   | 14   | 16     | 279(2)       | control       |                  |               |
|                                                                                                    | N2 300 mM                          | 18.0                 | 0.4 | 13                          | 19   | 22   | 26     | 253(0)       | <0.0001       |                  |               |
|                                                                                                    | <i>sir-2.1</i> 50 mM               | 14.0                 | 0.1 | 12                          | 14   | 15.5 | 18     | 296(0)       | <0.0001       |                  |               |
|                                                                                                    | <i>sir-2.1</i> 300 mM              | 18.3                 | 0.3 | 15                          | 19   | 21   | 25     | 277(0)       | <0.0001       | <0.0001          |               |
|                                                                                                    | <i>sir-2.2</i> 50 mM               | 12.3                 | 0.1 | 11                          | 12   | 14   | 15     | 334(0)       | 0.2825        |                  |               |
|                                                                                                    | <i>sir-2.2</i> 300 mM              | 15.2                 | 0.3 | 12                          | 15   | 19   | 21     | 292(0)       | <0.0001       | <0.0001          |               |
|                                                                                                    | <i>sir-2.3</i> 50 mM               | 11.6                 | 0.1 | 11                          | 12   | 13   | 14     | 297(1)       | <0.0001       |                  |               |
|                                                                                                    | <i>sir-2.3</i> 300 mM              | 14.7                 | 0.2 | 11                          | 15   | 18   | 22     | 299(2)       | <0.0001       | <0.0001          |               |
|                                                                                                    | <i>sir-2.4</i> 50 mM               | 12.4                 | 0.1 | 11                          | 13   | 14   | 16     | 315(0)       | 0.6232        |                  |               |
| <i>sir-2.4</i> 300 mM                                                                              | 16.5                               | 0.3                  | 13  | 17                          | 20   | 24   | 296(1) | <0.0001      | <0.0001       |                  |               |

|                                                                                                    | Experimental group                      | Mean lifespan (days) | SEM | Lifespan percentiles (days) |     |     |     | N (censored) | P vs. control | P vs. 50 mM NaCl | P vs. no FUdR |
|----------------------------------------------------------------------------------------------------|-----------------------------------------|----------------------|-----|-----------------------------|-----|-----|-----|--------------|---------------|------------------|---------------|
|                                                                                                    |                                         |                      |     | 25%                         | 50% | 75% | 95% |              |               |                  |               |
| <b>Experiment 11,</b><br>shown in Figure 5D.<br>3 pooled replicates,<br>25° C, 400 μM<br>FUdR.     | N2 50 mM                                | 14.1                 | 0.1 | 14                          | 14  | 14  | 16  | 261(1)       | control       |                  |               |
|                                                                                                    | N2 300 mM                               | 18.0                 | 0.4 | 13                          | 18  | 20  | 26  | 193(6)       | <0.0001       |                  |               |
|                                                                                                    | <i>sir-2.1; sir-2.2; sir-2.4</i> 50 mM  | 14.2                 | 0.1 | 14                          | 14  | 16  | 19  | 286(4)       | 0.7255        |                  |               |
|                                                                                                    | <i>sir-2.1; sir-2.2; sir-2.4</i> 300 mM | 14.6                 | 0.2 | 11                          | 15  | 18  | 22  | 316(0)       | 0.0001        | 0.0002           |               |
|                                                                                                    | <i>sir-2.1; sir-2.3; sir-2.4</i> 50 mM  | 14.9                 | 0.1 | 14                          | 14  | 16  | 19  | 331(0)       | <0.0001       |                  |               |
|                                                                                                    | <i>sir-2.1; sir-2.3; sir-2.4</i> 300 mM | 16.4                 | 0.3 | 13                          | 18  | 20  | 22  | 307(0)       | <0.0001       | <0.0001          |               |
| <b>Experiment 12,</b><br>shown in Figure 6C.<br>2 pooled replicates,<br>20° C, 0 or 400 μM<br>FUdR | N2 50 mM                                | 16.4                 | 0.4 | 14                          | 16  | 21  | 27  | 164(41)      | control       |                  |               |
|                                                                                                    | N2 300 mM                               | 10.1                 | 0.2 | 8                           | 10  | 10  | 16  | 161(24)      | <0.0001       |                  |               |
|                                                                                                    | N2 50 mM + FUdR                         | 17.3                 | 0.3 | 16                          | 18  | 18  | 21  | 167(40)      | 1.0000        |                  |               |
|                                                                                                    | N2 300 mM + FUdR                        | 20.0                 | 0.3 | 18                          | 21  | 22  | 25  | 167(3)       | 0.0001        | <0.0001          | <0.0001       |
|                                                                                                    | <i>daf-16</i> 50 mM                     | 14.4                 | 0.3 | 12                          | 14  | 18  | 21  | 165(45)      | 0.0002        |                  |               |
|                                                                                                    | <i>daf-16</i> 300 mM                    | 8.8                  | 0.2 | 8                           | 8   | 10  | 14  | 162(33)      | <0.0001       | <0.0001          |               |
|                                                                                                    | <i>daf-16</i> 50 mM + FUdR              | 14.8                 | 0.2 | 14                          | 16  | 16  | 18  | 170(22)      | 0.0006        |                  | 1.0000        |
|                                                                                                    | <i>daf-16</i> 300 mM + FUdR             | 13.9                 | 0.2 | 14                          | 14  | 14  | 18  | 165(4)       | <0.0001       | 0.0002           | <0.0001       |
| <b>Experiment 13,</b><br>shown in Figure S2.<br>20° C, 0 or 400 μM<br>FUdR                         | 50 mM NaCl                              | 11.3                 | 0.5 | 6                           | 11  | 16  | 18  | 89(1)        | control       |                  |               |
|                                                                                                    | 50 mM NaCl + FUdR                       | 11.0                 | 0.6 | 6                           | 11  | 16  | 21  | 90(0)        | 1.0000        |                  |               |
|                                                                                                    | 300 mM NaCl                             | 8.1                  | 0.5 | 4                           | 8   | 11  | 16  | 88(2)        | <0.0001       |                  |               |
|                                                                                                    | 300 mM NaCl + FUdR                      | 14.9                 | 0.6 | 11                          | 15  | 18  | 25  | 90(0)        | 0.0001        | 0.0006           | <0.0001       |
|                                                                                                    | 50 mM NaCl + 250 mM KCl                 | 12.3                 | 0.5 | 8                           | 14  | 16  | 21  | 88(0)        | 1.0000        |                  |               |
|                                                                                                    | 50 mM NaCl + 250 mM KCl + FUdR          | 17.8                 | 0.5 | 14                          | 18  | 21  | 25  | 90(0)        | <0.0001       | <0.0001          | <0.0001       |
|                                                                                                    | 50 mM NaCl + 500 mM glycerol            | 10.1                 | 0.5 | 6                           | 8   | 14  | 18  | 90(0)        | 0.8639        |                  |               |
|                                                                                                    | 50 mM NaCl + 500 mM glycerol + FUdR     | 17.4                 | 0.6 | 14                          | 18  | 23  | 25  | 90(0)        | <0.0001       | <0.0001          | <0.0001       |
|                                                                                                    | 50 mM NaCl + 500 mM sorbitol            | 8.7                  | 0.5 | 4                           | 8   | 14  | 16  | 90(0)        | 0.0075        |                  |               |
|                                                                                                    | 50 mM NaCl + 500 mM sorbitol + FUdR     | 16.5                 | 0.7 | 11                          | 16  | 21  | 28  | 90(0)        | <0.0001       | <0.0001          | <0.0001       |

|                                                                                     | Experimental group                                                                  | Mean lifespan (days)       | SEM  | Lifespan percentiles (days) |     |     |     | N (censored) | P vs. control | P vs. 50 mM NaCl | P vs. no FUdR |  |
|-------------------------------------------------------------------------------------|-------------------------------------------------------------------------------------|----------------------------|------|-----------------------------|-----|-----|-----|--------------|---------------|------------------|---------------|--|
|                                                                                     |                                                                                     |                            |      | 25%                         | 50% | 75% | 95% |              |               |                  |               |  |
| <b>Experiment 14,</b><br>shown in Figure S4A. 1 replicate, 20° C, 0 or 400 μM FUdR. | N2 50 mM                                                                            | 16.1                       | 0.7  | 12                          | 14  | 22  | 27  | 74(21)       | control       |                  |               |  |
|                                                                                     | N2 300 mM                                                                           | 9.7                        | 0.3  | 8                           | 10  | 10  | 16  | 71(7)        | <0.0001       |                  |               |  |
|                                                                                     | N2 50 mM + FUdR                                                                     | 17.3                       | 0.4  | 16                          | 18  | 20  | 22  | 76(24)       | 1.0000        |                  |               |  |
|                                                                                     | N2 300 mM + FUdR                                                                    | 20.7                       | 0.4  | 20                          | 22  | 22  | 27  | 77(2)        | 0.0006        | <0.0001          | <0.0001       |  |
|                                                                                     | <i>mes-1</i> 50 mM GC+                                                              | 15.5                       | 0.6  | 12                          | 14  | 20  | 24  | 74(13)       | 1.0000        |                  |               |  |
|                                                                                     | <i>mes-1</i> 300 mM GC+                                                             | 9.7                        | 0.3  | 8                           | 10  | 10  | 14  | 72(16)       | <0.0001       | <0.0001          |               |  |
|                                                                                     | <i>mes-1</i> 50 mM + FUdR GC+                                                       | 17.1                       | 0.4  | 14                          | 16  | 20  | 22  | 75(6)        | 1.0000        |                  | 1.0000        |  |
|                                                                                     | <i>mes-1</i> 300 mM + FUdR GC+                                                      | 20.3                       | 0.5  | 18                          | 20  | 24  | 27  | 74(11)       | 0.0021        | 0.0001           | <0.0001       |  |
|                                                                                     | <i>mes-1</i> 50 mM GC- <i>mes-1</i> 300 mM GC-                                      | 22.7                       | 1.2  | 14                          | 20  | 31  | 37  | 78(29)       | 0.0001        |                  |               |  |
|                                                                                     | <i>mes-1</i> 50 mM + FUdR GC-                                                       | 25.9                       | 1.2  | 20                          | 27  | 32  | 39  | 68(16)       | <0.0001       |                  | 1.0000        |  |
|                                                                                     | <i>mes-1</i> 300 mM + FUdR GC-                                                      | 26.6                       | 1.0  | 22                          | 27  | 32  | 37  | 70(5)        | <0.0001       | 1.0000           | <0.0001       |  |
|                                                                                     | <b>Experiment 15,</b><br>shown in Figure S4B. 1 replicate, 20° C, 0 or 400 μM FUdR. | N2 50 mM, live OP50        | 14.5 | 0.6                         | 10  | 14  | 18  | 23           | 97(31)        | control          |               |  |
|                                                                                     |                                                                                     | N2 300 mM, live OP50       | 10.5 | 0.4                         | 8   | 10  | 11  | 18           | 96(17)        | <0.0001          |               |  |
|                                                                                     |                                                                                     | N2 50 mM + FUdR, live OP50 | 17.3 | 0.4                         | 14  | 18  | 21  | 21           | 100(50)       | 0.0182           |               |  |
| N2 300 mM + FUdR, live OP50                                                         |                                                                                     | 19.8                       | 0.4  | 18                          | 21  | 21  | 26  | 99(0)        | <0.0001       | 0.0003           | <0.0001       |  |
| N2 50 mM, dead OP50                                                                 |                                                                                     | 23.1                       | 0.5  | 21                          | 23  | 26  | 28  | 97(38)       | <0.0001       |                  |               |  |
| N2 300 mM, dead OP50                                                                |                                                                                     | 16.6                       | 0.3  | 16                          | 16  | 18  | 21  | 93(25)       | 0.3139        | <0.0001          |               |  |
| N2 50 mM + FUdR, dead OP50                                                          |                                                                                     | 17.0                       | 0.3  | 14                          | 16  | 18  | 23  | 98(13)       | 0.0398        |                  | <0.0001       |  |
| N2 300 mM + FUdR, dead OP50                                                         |                                                                                     | 20.6                       | 0.3  | 18                          | 21  | 21  | 26  | 99(1)        | <0.0001       | <0.0001          | <0.0001       |  |

| Experimental group                                                                     | Mean lifespan (days) | SEM | Lifespan percentiles (days) |     |     |     | N (censored) | P vs. control | P vs. 50 mM NaCl | P vs. no FUdR |
|----------------------------------------------------------------------------------------|----------------------|-----|-----------------------------|-----|-----|-----|--------------|---------------|------------------|---------------|
|                                                                                        |                      |     | 25%                         | 50% | 75% | 95% |              |               |                  |               |
| <b>Experiment 16,</b><br>shown in Figure S8C. 20° C, no FUdR.                          |                      |     |                             |     |     |     |              |               |                  |               |
| Control 50 mM                                                                          | 11.8                 | 0.6 | 8                           | 11  | 16  | 21  | 88(0)        | Control       |                  |               |
| Control 300 mM                                                                         | 7.8                  | 0.5 | 4                           | 6   | 11  | 14  | 90(0)        | <0.0001       |                  |               |
| <i>sir-2.1(OE)</i> 50 mM                                                               | 11.6                 | 0.5 | 8                           | 11  | 16  | 18  | 90(1)        | 1.0000        |                  |               |
| <i>sir-2.1(OE)</i> 300 mM                                                              | 7.3                  | 0.5 | 4                           | 6   | 11  | 16  | 90(0)        | <0.0001       | <0.0001          |               |
| <b>Experiment 17,</b><br>shown in Figure S8D. 4 pooled replicates, 20° C, no FUdR.     |                      |     |                             |     |     |     |              |               |                  |               |
| Control 50 mM                                                                          | 14.2                 | 0.2 | 12                          | 14  | 16  | 20  | 265(13)      | control       |                  |               |
| Control 300 mM                                                                         | 7.1                  | 0.2 | 6                           | 8   | 8   | 12  | 298(3)       | <0.0001       |                  |               |
| <i>sir-2.1OE; sir-2.2OE; sir-2.3 OE</i> 50 mM                                          | 13.3                 | 0.3 | 10                          | 14  | 16  | 20  | 231(40)      | 0.0353        |                  |               |
| <i>sir-2.1OE; sir-2.2OE; sir-2.3 OE</i> 300 mM                                         | 8.6                  | 0.2 | 6                           | 8   | 12  | 18  | 277(0)       | <0.0001       | <0.0001          |               |
| <b>Experiment 18,</b><br>shown in Figure S10. 3 pooled replicates, 25° C, 400 μM FUdR. |                      |     |                             |     |     |     |              |               |                  |               |
| N2 50 mM                                                                               | 14.8                 | 0.2 | 13                          | 15  | 16  | 19  | 259(4)       | control       |                  |               |
| N2 300 mM                                                                              | 19.1                 | 0.3 | 15                          | 20  | 22  | 26  | 255(18)      | <0.0001       |                  |               |
| <i>daf-16</i> 50 mM                                                                    | 11.6                 | 0.1 | 11                          | 12  | 12  | 14  | 265(3)       | <0.0001       |                  |               |
| <i>daf-16</i> 300 mM                                                                   | 10.0                 | 0.1 | 8                           | 11  | 11  | 12  | 280(5)       | <0.0001       | <0.0001          |               |
| <i>osm-7; osm-11; daf-16</i> 50 mM                                                     | 10.7                 | 0.1 | 10                          | 11  | 12  | 15  | 256(1)       | <0.0001       |                  |               |
| <i>osm-7; osm-11; daf-16</i> 300 mM                                                    | 8.7                  | 0.1 | 7                           | 9   | 10  | 12  | 275(2)       | <0.0001       | <0.0001          |               |
