# Supplementary material
Source: PubMed Central journal article supplement (PMC4789167)
Supplement: NIHMS762151-supplement-3.pdf [file NIHMS762151-supplement-3.pdf]

**Supplemental Table 2: Details of censor causes for experiments in Figures 2A and 2B**

High doses of FUdR cause a large proportion of animals on 50 mM NaCl to rupture. The proportion of rupturing is reduced for FUdR-treated animals on 100 mM NaCl, and almost completely absent for animals on 200-500 mM NaCl.

Abbreviations used for censor causes: Bag, animals with internally hatched progeny. Rup, ruptured vulva with protruding gonad or intestine. Missing, animals found desiccated on side or lid of plates or missing altogether. Other, all censor causes not related to any phenotype or pathology, including handling injury or contaminated plates.

|                                                                                                       |                          | Censored observations |     |     |         |       |       |
|-------------------------------------------------------------------------------------------------------|--------------------------|-----------------------|-----|-----|---------|-------|-------|
|                                                                                                       | Experimental group       | Total observations    | Bag | Rup | Missing | Other | Total |
| <b>Experiment 6</b> ,<br>shown in Figure 2C. 2 pooled replicates, 20 C, 0 or 400 $\mu$ M FUdR.        | 50 mM                    | 193                   | 11  | 1   | 19      | 29    | 60    |
|                                                                                                       | 100 mM                   | 178                   | 7   | 1   | 10      | 22    | 40    |
|                                                                                                       | 200 mM                   | 194                   | 19  | 2   | 11      | 2     | 34    |
|                                                                                                       | 300 mM                   | 194                   | 15  | 1   | 7       | 1     | 24    |
|                                                                                                       | 400 mM                   | 193                   | 20  | 0   | 2       | 2     | 23    |
|                                                                                                       | 500 mM                   | 202                   | 1   | 0   | 1       | 0     | 2     |
|                                                                                                       | 50 mM + FUdR             | 188                   | 1   | 39  | 0       | 0     | 40    |
|                                                                                                       | 100 mM + FUdR            | 192                   | 1   | 21  | 0       | 0     | 22    |
|                                                                                                       | 200 mM + FUdR            | 197                   | 1   | 1   | 3       | 0     | 5     |
|                                                                                                       | 300 mM + FUdR            | 192                   | 0   | 0   | 4       | 0     | 4     |
|                                                                                                       | 400 mM + FUdR            | 196                   | 3   | 1   | 3       | 2     | 9     |
| 500 mM + FUdR                                                                                         | 196                      | 0                     | 0   | 0   | 0       | 0     |       |
| <b>Experiment 7</b> ,<br>shown in Figure 2D. 3 pooled replicates, 20 C, 0, 8, 40 or 400 $\mu$ M FUdR. | 50 mM, 0 $\mu$ M FUdR    | 226                   | 41  | 2   | 17      | 13    | 73    |
|                                                                                                       | 50 mM, 8 $\mu$ M FUdR    | 228                   | 0   | 2   | 22      | 29    | 53    |
|                                                                                                       | 50 mM, 40 $\mu$ M FUdR   | 226                   | 0   | 5   | 10      | 1     | 16    |
|                                                                                                       | 50 mM, 400 $\mu$ M FUdR  | 232                   | 0   | 86  | 2       | 0     | 88    |
|                                                                                                       | 300 mM, 0 $\mu$ M FUdR   | 241                   | 49  | 2   | 10      | 32    | 93    |
|                                                                                                       | 300 mM, 8 $\mu$ M FUdR   | 232                   | 0   | 1   | 8       | 0     | 9     |
|                                                                                                       | 300 mM, 40 $\mu$ M FUdR  | 239                   | 0   | 1   | 16      | 1     | 18    |
|                                                                                                       | 300 mM, 400 $\mu$ M FUdR | 232                   | 0   | 0   | 11      | 0     | 11    |
